# Supplementary material for: Effect of Pd Precursor Salts on the Chemical State, Particle Size, and Performance of Activated Carbon-Supported Pd Catalysts for the Selective Hydrogenation of Palm Biodiesel
Source: Int J Mol Sci. 2021 Jan 27;22(3):1256. doi: 10.3390/ijms22031256 (PMC7865769; doi:10.3390/ijms22031256)
Supplement: Supplementary file 1 [file ijms-22-01256-s001.pdf]

## **Supplementary Information**

### **Effect of Pd precursor salts on the chemical state, particle size, and performance of activated carbon-supported Pd catalysts for the selective hydrogenation of palm biodiesel**

Parncheewa Udomsap, Apiluck Eiad-Ua,\* Shih-Yuan Chen,\* Takehisa Mochizuki,\*  
Nuwong Chollacoop, Yuji Yoshimura, Masayasu Nishi, Hiroyuki Tateno and Hideyuki  
Takagi

#### **Table of Contents**

|                                                                                                                                                                                                                                                                                                                                                              |          |
|--------------------------------------------------------------------------------------------------------------------------------------------------------------------------------------------------------------------------------------------------------------------------------------------------------------------------------------------------------------|----------|
| <b>Preparation of 1%Pd/AC (nit) and 1%Pd/AC (amc) catalysts.....</b>                                                                                                                                                                                                                                                                                         | <b>2</b> |
| <b>Preparation of Cl-containing 1%Pd/AC (nit) and Cl-free 1%Pd/AC (amc).....</b>                                                                                                                                                                                                                                                                             | <b>2</b> |
| <b>Table S1.</b> The elemental analysis of 1%Pd/AC(nit) and 1%Pd/AC(amc) catalysts and corresponding Cl-containing and Cl-free counterparts.....                                                                                                                                                                                                             | <b>3</b> |
| <b>Fig. S1.</b> Temperature dependence on the formation of CH <sub>4</sub> , CO and CO <sub>2</sub> over the 1%Pd/AC(nit) catalyst during the H <sub>2</sub> -TPR experiment. The CH <sub>4</sub> , CO and CO <sub>2</sub> were monitored by mass spectrometer using m/z ratios of 16, 28 and 44, respectively.....                                          | <b>4</b> |
| <b>Fig. S2.</b> XPS analysis of the chemical states of Cl in 1%Pd/AC (amc). The dark gray and light gray areas under the fitting curves illustrate the Cl–Pd and Cl–organic compound bonds.....                                                                                                                                                              | <b>5</b> |
| <b>Fig. S3.</b> XRD patterns of used Pd/AC (nit) and Pd/AC (amc) catalysts.....                                                                                                                                                                                                                                                                              | <b>6</b> |
| <b>Fig. S4.</b> (a) Poly-FAME conversion as a function of reaction time, and percentages of (b) mono-FAME (c) <i>cis</i> -mono-FAME and (d) sat-FAME as functions of the poly-FAME conversion over the Cl-containing catalysts of (□) 1%Pd/AC (nit)-Cl and (●) 1%Pd/AC (amc), and the Cl-free catalysts of (■) 1%Pd/AC (nit) and (○) 1%Pd/AC (amc)-noCl..... | <b>7</b> |

### **Preparation of 1%Pd/AC (nit) and 1%Pd/AC (amc) catalysts**

The preparation of 1%Pd/AC(nit) and 1%Pd/AC(amc) catalysts was used the same manner of section 3.2, which is described below. Before impregnation, AC was dried at 110 °C. Two Pd/AC catalysts with Pd loadings of 1 wt.% were prepared via the impregnation of Pd aqueous solutions on AC under vacuum (approximately 0.1 torr) at 25 °C followed by aging for 24 h. The Pd aqueous solutions were obtained by dissolving 0.022 g of  $\text{Pd}(\text{NO}_3)_2 \cdot x\text{H}_2\text{O}$  and 0.025 g  $\text{Pd}(\text{NH}_3)_4\text{Cl}_2 \cdot x\text{H}_2\text{O}$  precursors in 0.4 mL of deionized water. The samples were subsequently dried at 60 °C for 6 h using a rotary evaporator followed by calcination at 300 °C in a  $\text{N}_2$  flow for 2 h. The prepared samples were labeled 1%Pd/AC (nit) and 1%Pd/AC (amc), where (nit) and (amc) indicate that  $\text{Pd}(\text{NO}_3)_2 \cdot x\text{H}_2\text{O}$  and  $\text{Pd}(\text{NH}_3)_4\text{Cl}_2 \cdot x\text{H}_2\text{O}$  were used as precursors, respectively. Prior to using the catalysts for the partial hydrogenation of palm-FAME, they were reduced at 300 °C for 1 h under a  $\text{H}_2$  flow of 50 mL min<sup>-1</sup>.

### **Preparation of Cl-containing 1%Pd/AC (nit) and Cl-free 1%Pd/AC (amc)**

For deep understanding of the effect of Cl residue, the as-prepared 1%Pd/AC (nit) catalyst was impregnated by an aqueous solution ( $\text{NH}_4\text{Cl}$ ), and the loading of  $\text{NH}_4\text{Cl}$  was 0.1 wt.%. Then, the sample was dried at 110 °C for 4 h, followed by reduced at 300 °C for 1 h under a  $\text{H}_2$  flow of 50 mL min<sup>-1</sup>. As a result, the Cl-containing 1%Pd/AC (nit) catalyst (termed 1%Pd/AC (nit)-Cl)) was obtained. The XPS analysis indicated that the 1%Pd/AC (nit)-Cl catalyst contains approximately 0.08 wt.% of Cl.

On the other hand, the as-prepared 1%Pd/AC (amc) catalyst was further washed by 0.1 M of  $\text{NH}_4\text{OH}$  solution to remove the Cl residues. The washed sample was dried at 110 °C for 4 h, followed by reduced at 300 °C for 1 h under a  $\text{H}_2$  flow of 50 mL min<sup>-1</sup>. As a result, the Cl-free 1%Pd/AC (amc) catalyst (termed 1%Pd/AC (amc)-noCl) was obtained. The XPS analysis indicated that the Cl concentration of 1%Pd/AC (amc)-noCl catalyst was lower than the detection limit.

**Table S1.** The elemental analysis of 1%Pd/AC(nit) and 1%Pd/AC(amt) catalysts and corresponding Cl-containing and Cl-free counterparts.

| Sample             | Pd<br>(wt.%) | Cl <sup>1</sup><br>(wt.%) |
|--------------------|--------------|---------------------------|
| AC                 | -            | n.d. <sup>2</sup>         |
| 1%Pd/AC (nit)      | 0.92         | n.d. <sup>2</sup>         |
| 1%Pd/AC (nit)-Cl   | 0.87         | 0.08                      |
| 1%Pd/AC (amt)      | 1.03         | 0.11                      |
| 1%Pd/AC (amt)-noCl | 0.95         | n.d. <sup>2</sup>         |

<sup>1</sup> Determined by the XPS analysis.

<sup>2</sup> Not detectable (n.d.). The Cl content was lower than the detection limit of the X-ray fluorescence instrument (< 0.05 wt.%).

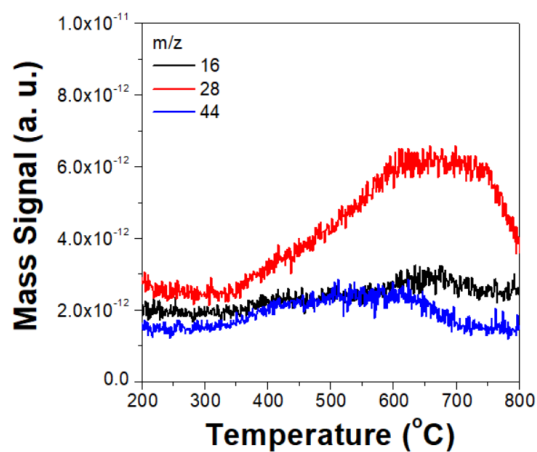

**Fig. S1.** Temperature dependence on the formation of CH<sub>4</sub>, CO, and CO<sub>2</sub> over the 1%Pd/AC(nit) catalyst during the H<sub>2</sub>-TPR experiment. The CH<sub>4</sub>, CO, and CO<sub>2</sub> were monitored by mass spectrometer using m/z ratios of 16, 28, and 44, respectively.

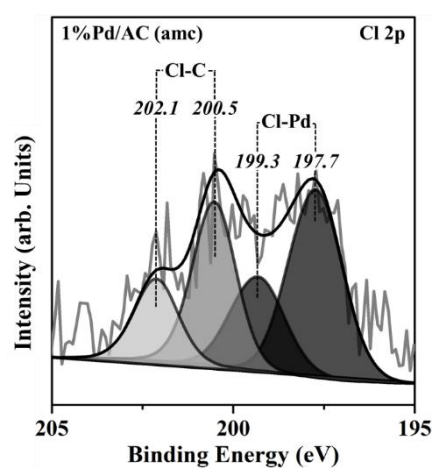

**Fig. S2.** XPS analysis of the chemical states of Cl in 1%Pd/AC (amc). The dark gray and light gray areas under the fitting curves illustrate the Cl–Pd and Cl–organic compound bonds.

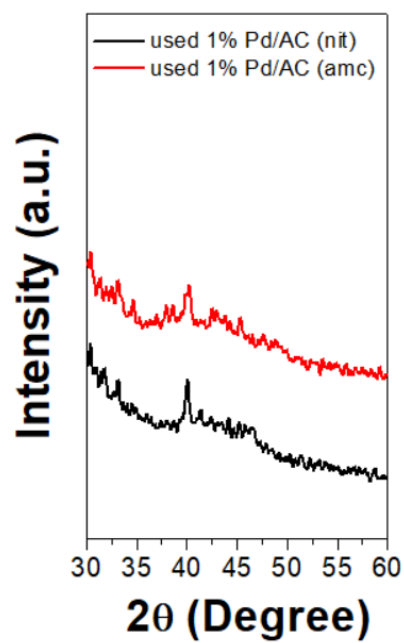

**Fig. S3.** XRD patterns of used Pd/AC (nit) and Pd/AC (amc) catalysts.

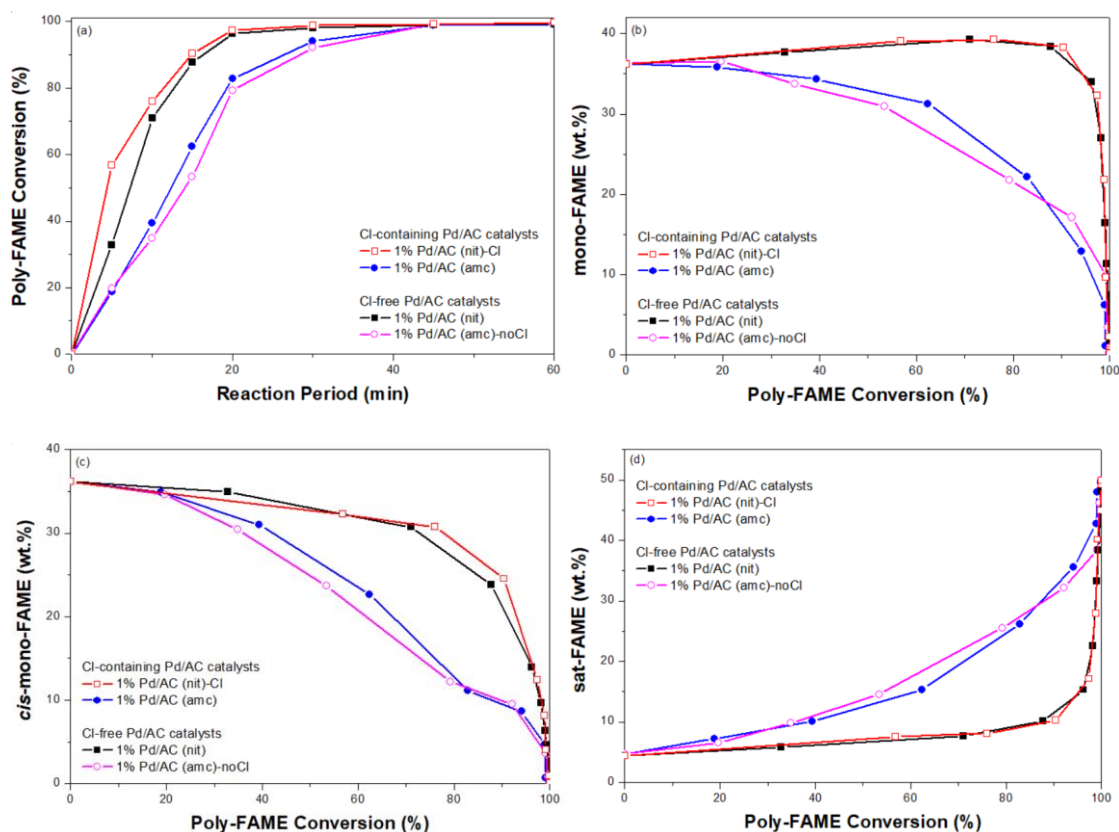

**Fig. S4.** (a) Poly-FAME conversion as a function of reaction time, and percentages of (b) mono-FAME, (c) *cis*-mono-FAME, and (d) sat-FAME as functions of the poly-FAME conversion over the Cl-containing catalysts of (□) 1%Pd/AC (nit)-Cl and (●) 1%Pd/AC (amc), and the Cl-free catalysts of (■) 1%Pd/AC (nit) and (○) 1%Pd/AC (amc)-noCl.
